# Supplementary material
Source: PubMed Central journal article supplement (PMC6371714)
Supplement: ehp-126-117004.smcontents.508.pdf [file ehp-126-117004.smcontents.508.pdf]

**Note to readers with disabilities:** *EHP* strives to ensure that all journal content is accessible to all readers. However, some figures and Supplemental Material published in *EHP* articles may not conform to [508 standards](#) due to the complexity of the information being presented. If you need assistance accessing journal content, please contact [ehp508@niehs.nih.gov](mailto:ehp508@niehs.nih.gov). Our staff will work with you to assess and meet your accessibility needs within 3 working days.

### **Supplemental Material**

#### **A Prospective Study of Environmental Exposures and Early Biomarkers in Autism Spectrum Disorder: Design, Protocols, and Preliminary Data from the MARBLES Study**

Irva Hertz-Picciotto, Rebecca J. Schmidt, Cheryl K. Walker, Deborah H. Bennett, McKenzie Oliver, Kristine M. Shedd-Wise, Janine M. LaSalle, Cecilia Giulivi, Birgit Puschner, Jennifer Thomas, Dorcas L. Roa, Isaac N. Pessah, Judy Van de Water, Daniel J. Tancredi, and Sally Ozonoff

#### **Table of Contents**

1) Understanding English and Mental Competence

2) Sample collection, containment, transport, processing and storage:

Sample Collection and Containment

Transport, Processing, and Storage

3) Neurodevelopmental assessments:

4) Health Information

Obtaining Health Records

Processing Health Records
